# Supplementary material for: Bioinspired chitosan based functionalization of biomedical implant surfaces for enhanced hemocompatibility, antioxidation and anticoagulation potential: an in silico and in vitro study
Source: Royal Society of Chemistry journal article supplement (doi:10.1039/d4ra00796d), 2024-01-01
Supplement: d4ra00796d1.pdf [file d4ra00796d1.pdf]

### Supplementary Data

*Table 1: Details of drug ligands and their bonding with proteins of coagulation cascade along with energy scores*

| <b>SR #</b> | <b>DRUG</b>    | <b>PROTEIN</b> | <b>ENERGY SCORE</b> |
|-------------|----------------|----------------|---------------------|
| <b>1</b>    | Fenchone       | VIIa           | - 4.9               |
| <b>2</b>    | Cinnamaldehyde | Xa             | -5.6                |
| <b>3</b>    | Camphor        | Xa             | -4.6                |
| <b>4</b>    | Ferulic acid   | Xa             | - 4.8               |
| <b>5</b>    | senkyunolide A | VIIa           | - 5.2               |

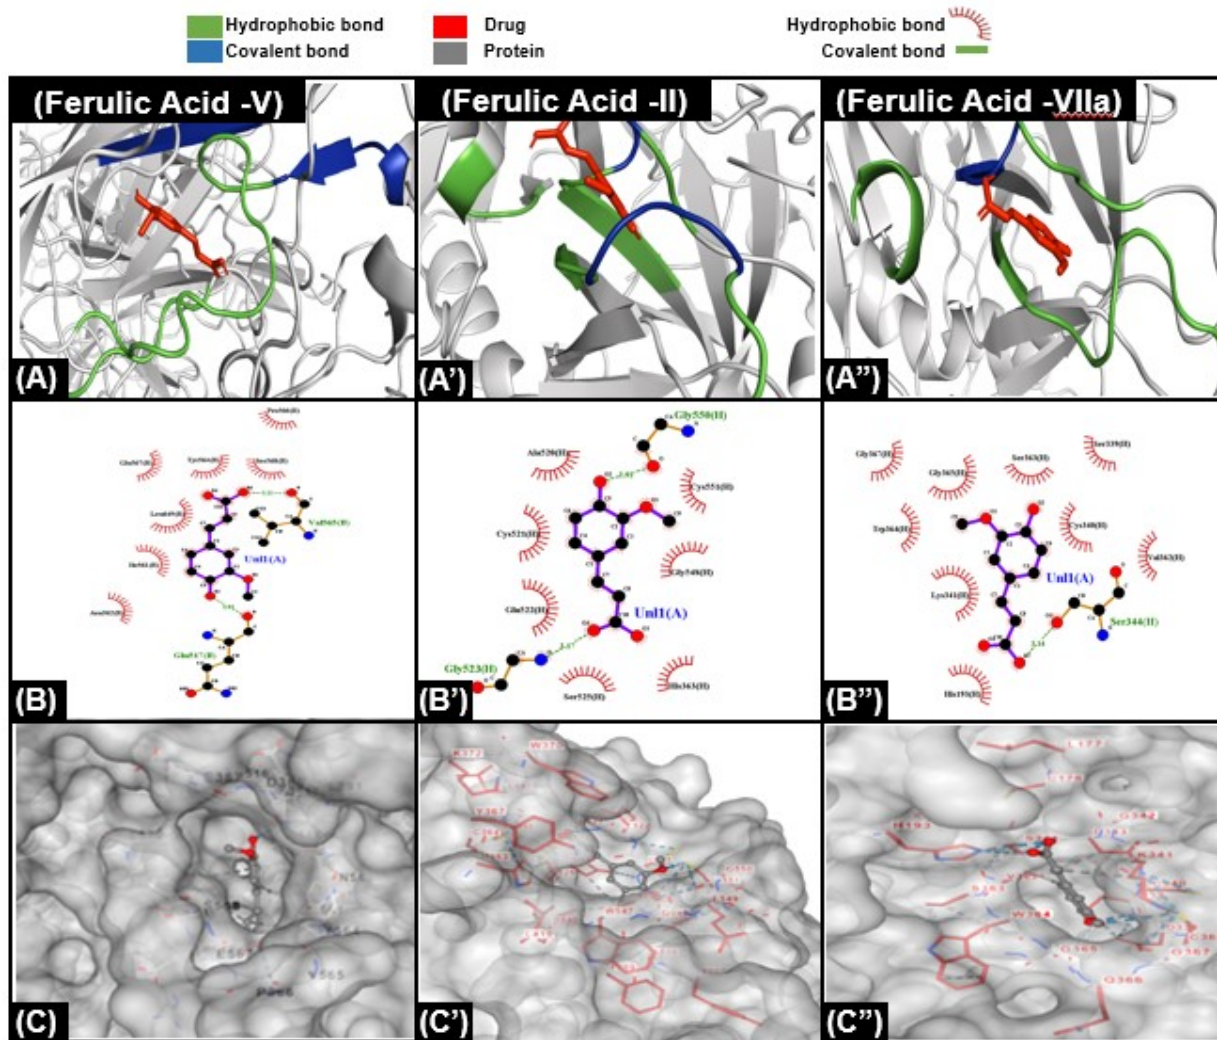

Figure S1: Demonstration of ferulic acid interaction with different proteins of coagulation cascade. These interactions were weaker as compared to its interaction and bonding with factor II.

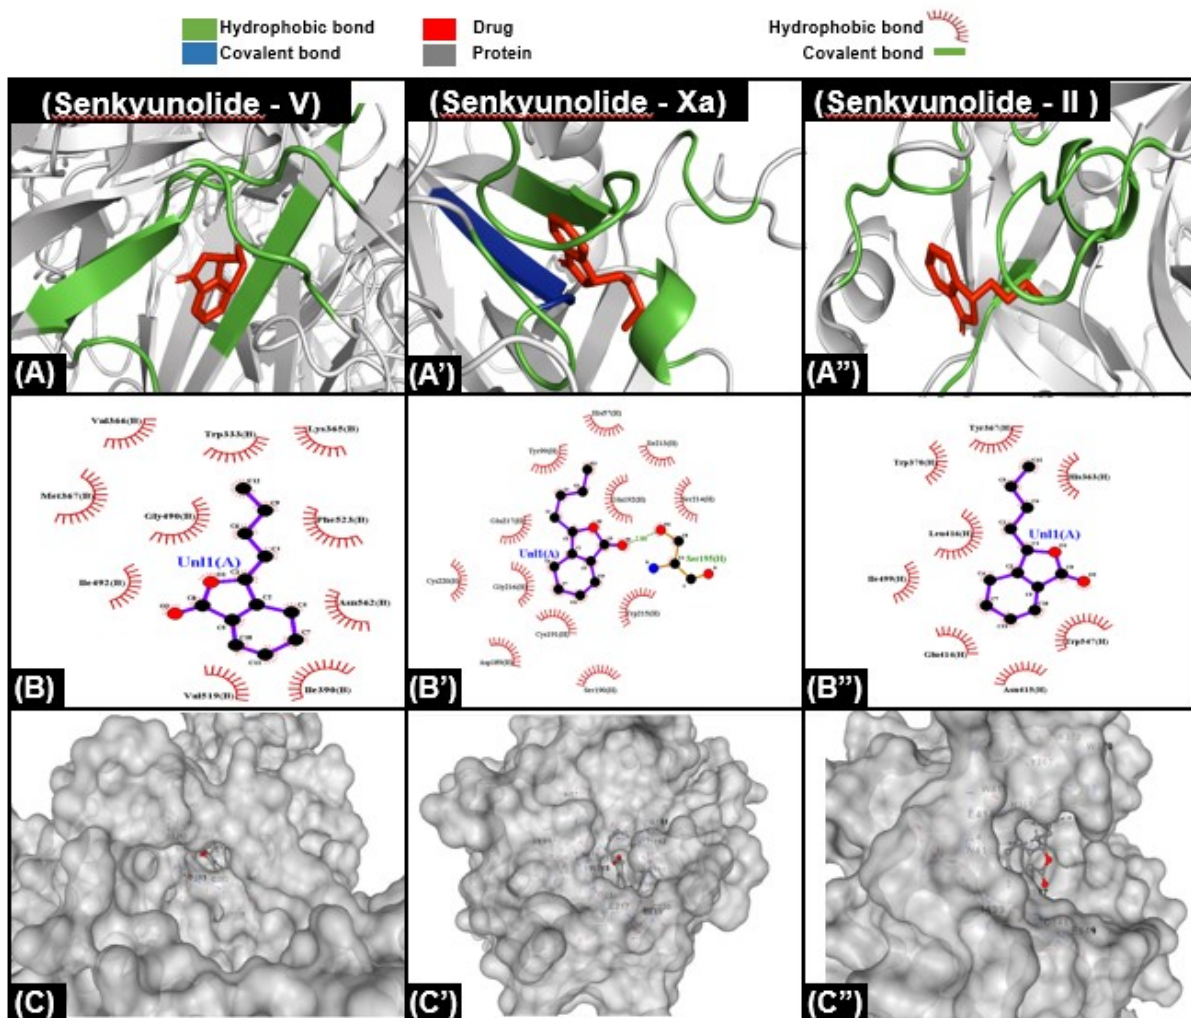

Figure S2: Demonstration of Senkyunolide interaction with different proteins of coagulation cascade i.e., V, Xa and II. These interactions were weaker as compared to its interaction and bonding with factor VIIa due to lesser number of hydrophobic and covalent bonding.

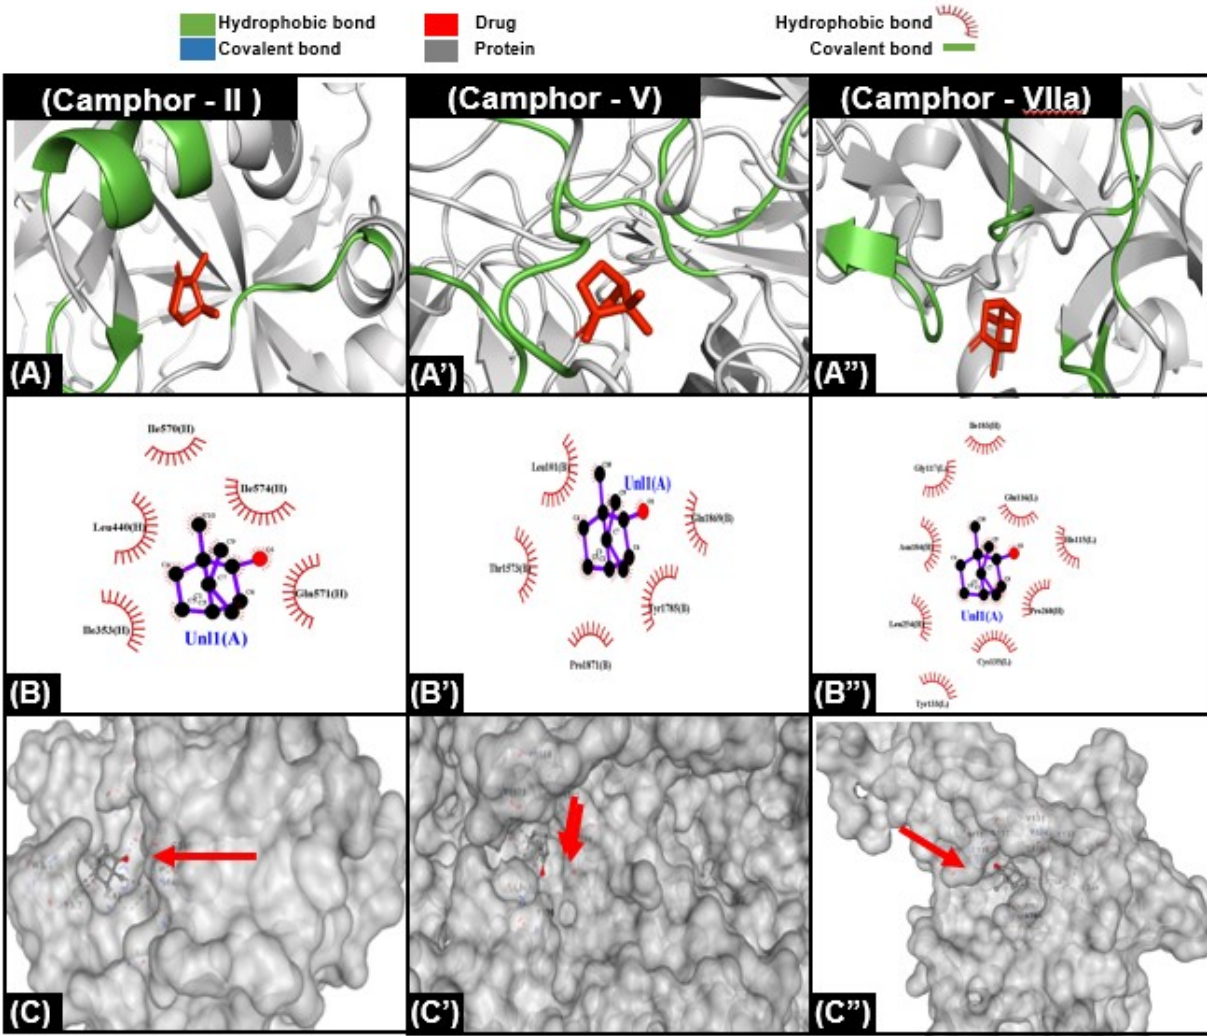

Figure S3: Demonstration of camphor interaction with different proteins of coagulation cascade.



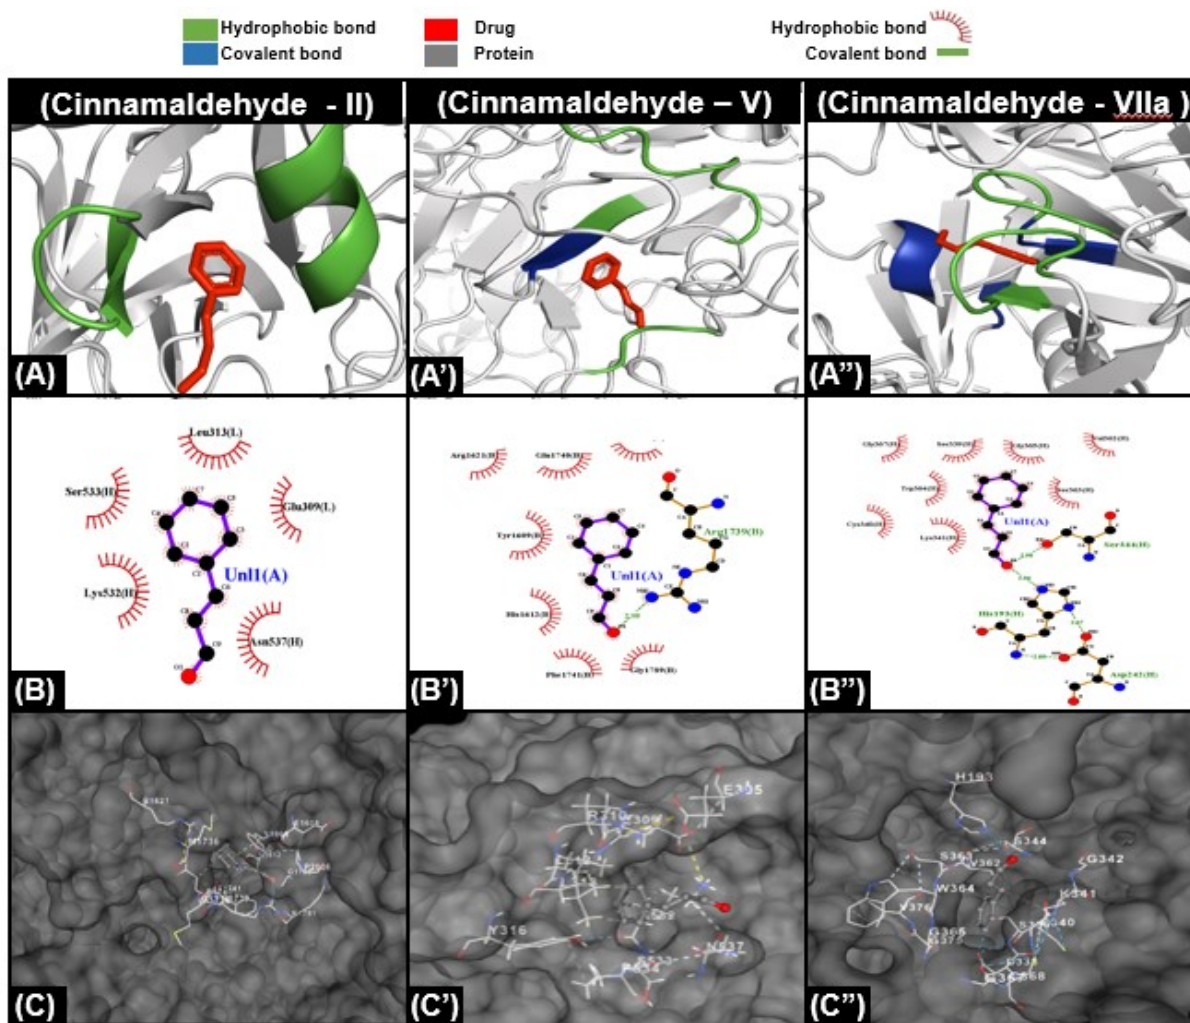

Figure S4: Demonstration of cinnamaldehyde interaction with different proteins of coagulation cascade.

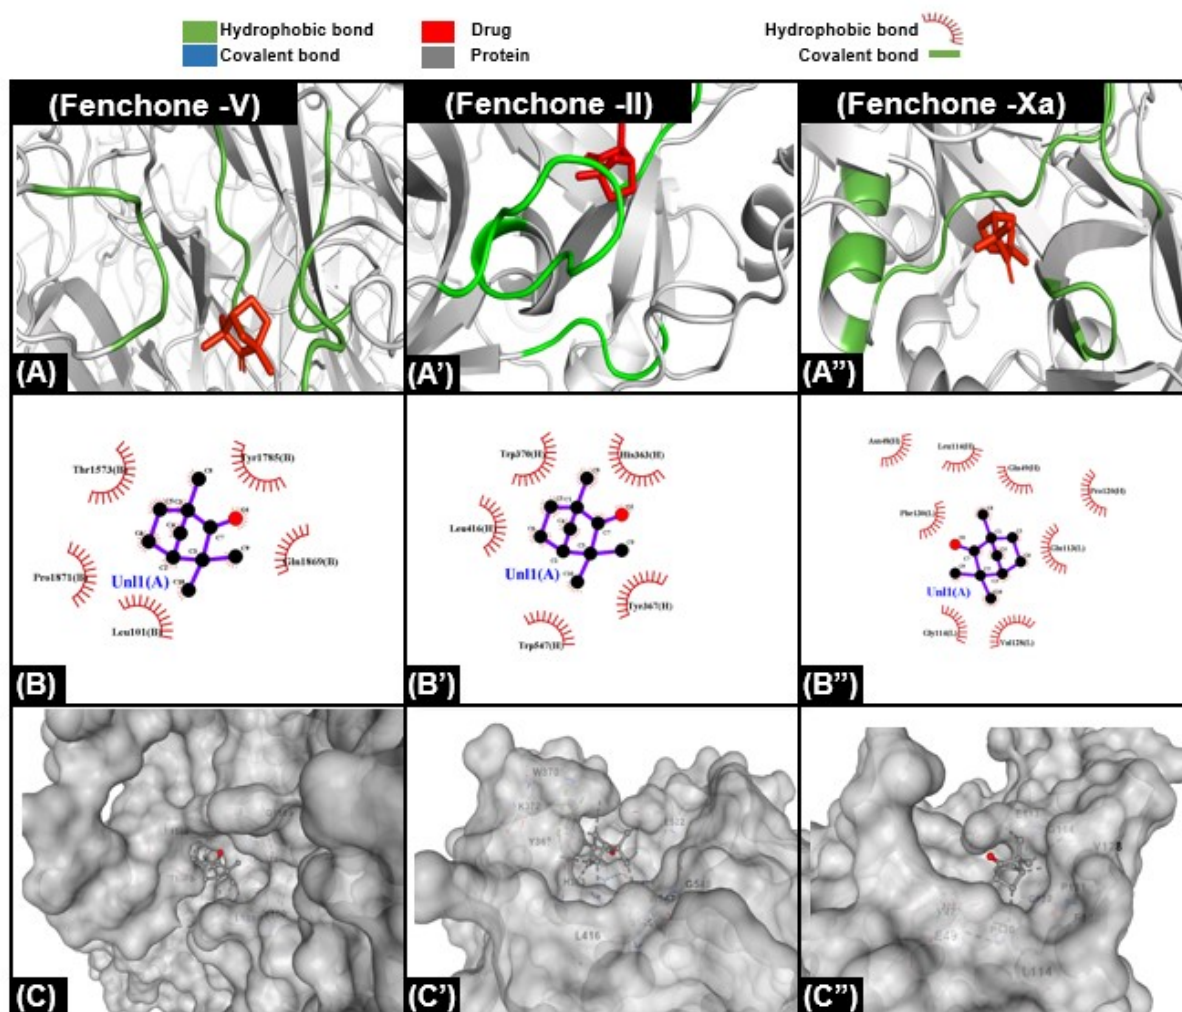

Figure S5: Demonstration of fenchone interaction with different proteins of coagulation cascade.

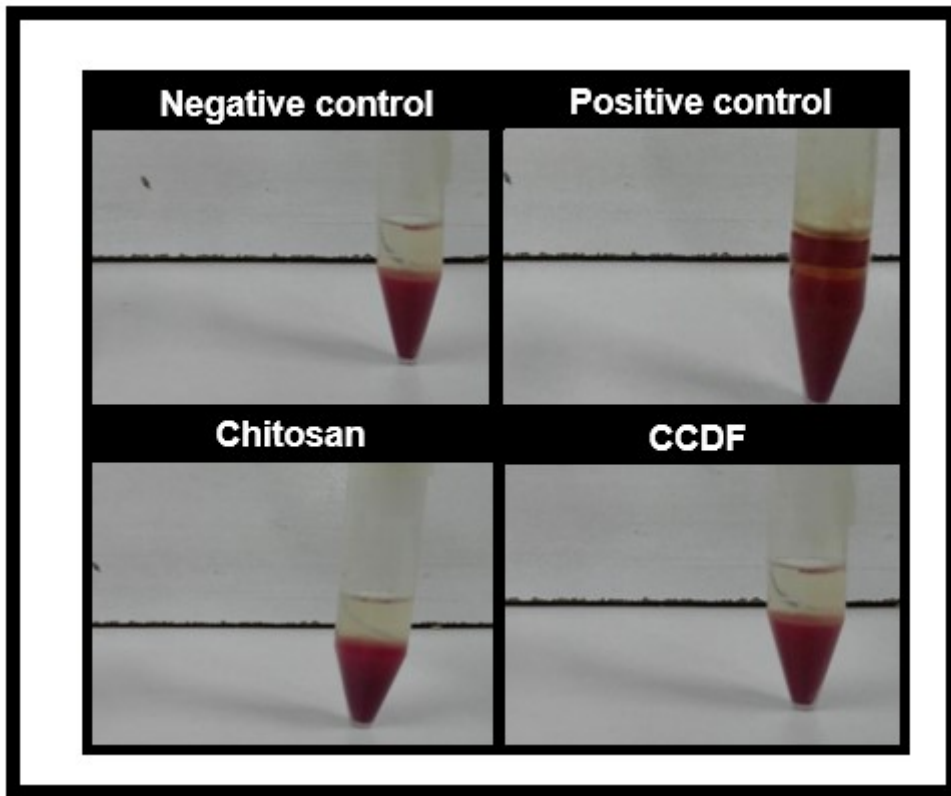

*Figure S6: Demonstration of hemolysis test for specimens*
